# Supplementary material for: Heat Stress Alleviation by Exogenous Calcium in the Orchid Dendrobium nobile Lindl: A Biochemical and Transcriptomic Analysis
Source: MDPI journal article supplement (doi:10.3390/ijms241914692), 2023-09-28
Supplement: s1 [file s1]

Table S1 Effect of CaCl<sub>2</sub> on factor complex matrix and eigenvector matrix of *D. nobile* under high temperature stress

| Number | Index                      | Innitial eigenvalue |        |        | Eigen vector |        |        |
|--------|----------------------------|---------------------|--------|--------|--------------|--------|--------|
|        |                            | 1                   | 2      | 3      | 1            | 2      | 3      |
| X1     | RWC                        | 0.886               | -0.207 | -0.294 | 0.271        | -0.105 | -0.250 |
| X2     | REC                        | -0.692              | 0.495  | 0.420  | -0.212       | 0.251  | 0.357  |
| X3     | MDA                        | -0.456              | 0.705  | -0.492 | -0.140       | 0.357  | -0.418 |
| X4     | Chla                       | 0.873               | -0.389 | -0.229 | 0.268        | -0.197 | -0.195 |
| X5     | Chlb                       | 0.831               | -0.432 | -0.026 | 0.255        | -0.219 | -0.022 |
| X6     | Chla+b                     | 0.856               | 0.058  | 0.342  | 0.262        | 0.029  | 0.291  |
| X7     | Car                        | 0.911               | -0.379 | -0.111 | 0.279        | -0.192 | -0.094 |
| X8     | SOD                        | 0.969               | -0.136 | -0.028 | 0.297        | -0.069 | -0.024 |
| X9     | POD                        | 0.792               | 0.316  | 0.513  | 0.243        | 0.160  | 0.436  |
| X10    | CAT                        | 0.729               | 0.682  | -0.016 | 0.223        | 0.345  | -0.014 |
| X11    | Pro                        | 0.873               | 0.437  | 0.207  | 0.268        | 0.221  | 0.176  |
| X12    | SS                         | 0.485               | 0.799  | 0.147  | 0.149        | 0.404  | 0.125  |
| X13    | SP                         | 0.658               | -0.519 | 0.205  | 0.202        | -0.263 | 0.174  |
| X14    | ASA                        | 0.948               | -0.230 | 0.183  | 0.290        | -0.116 | 0.155  |
| X15    | GSH                        | 0.926               | 0.284  | -0.163 | 0.284        | 0.144  | -0.139 |
| X16    | Flavonoids                 | 0.554               | 0.813  | -0.059 | 0.170        | 0.411  | -0.050 |
| X17    | Polyphenol                 | 0.758               | 0.399  | -0.513 | 0.232        | 0.202  | -0.436 |
|        | Eigen value                | 10.65               | 3.904  | 1.385  |              |        |        |
|        | Contribution(%)            | 62.649              | 22.965 | 8.146  |              |        |        |
|        | Cumulative contribution(%) | 62.649              | 85.614 | 93.760 |              |        |        |

Table S2 Total RNA sequencing yield statistics of each sample

| Sample | Raw reads | Raw bases | Clean reads | Clean bases | Error rate(%) | Q20(%) | Q30(%) | GC content(%) |
|--------|-----------|-----------|-------------|-------------|---------------|--------|--------|---------------|
| CK1    | 44716426  | 675218    | 44198958    | 655960      | 0.0264        | 97.53  | 92.86  | 45.99         |
| CK2    | 44594064  | 673370    | 43988822    | 643505      | 0.0261        | 97.61  | 93.14  | 45.9          |
| CK3    | 49723516  | 750825    | 49186726    | 728398      | 0.0255        | 97.84  | 93.66  | 45.82         |
| T1     | 44457032  | 6713011   | 43889566    | 644999      | 0.0257        | 97.76  | 93.5   | 46.45         |
| T2     | 44442822  | 671086    | 43889448    | 648325      | 0.0257        | 97.8   | 93.54  | 46.26         |
| T3     | 44387196  | 670246    | 43853072    | 650225      | 0.0263        | 97.55  | 92.97  | 45.75         |

Table S3 Primers used in this study for qRT-PCR assay

| <b>Genes_id</b> | <b>Primer</b>  | <b>Sequence</b>           |
|-----------------|----------------|---------------------------|
| TRINITY_DN3260  | Forward primer | GATCTCCTTAAAGATAAACAAGCCC |
|                 | Reverse primer | AAAGAACAATATCACTGACGTCTCC |
| TRINITY_DN45157 | Forward primer | ACTCTTCAGTTCTAGGAAAACCCA  |
|                 | Reverse primer | GGGTTGTAAGACTGCAACTTCAT   |
| TRINITY_DN14663 | Forward primer | AGAGCTCAGATGGAGAGGAATTT   |
|                 | Reverse primer | GATGTTCAAGATAGTTAGCAGCCAG |
| TRINITY_DN2523  | Forward primer | ACTCCCTTTCCTTTTCATCTCC    |
|                 | Reverse primer | AATGTCTTCTCGCTGCTGTAGTA   |
| TRINITY_DN3317  | Forward primer | CAAAGAGCTCATAGTAGGAAACGAG |
|                 | Reverse primer | TACCTACATCAGCAGATACAAGTGC |
| TRINITY_DN440   | Forward primer | CTCTCTAATGAGAAAAGGAAGACGA |
|                 | Reverse primer | GTCTCTACATTCGAAACCAGTTCTT |
| TRINITY_DN3350  | Forward primer | TATATGGAATCATACCAGAGAAGGG |
|                 | Reverse primer | ACGAATCTTGTCAATATCTGGAGAC |
| TRINITY_DN19125 | Forward primer | AAGGCTTCTGTCCAACCTCCA     |
|                 | Reverse primer | CCACATAAGACTCCACCACAAC    |
| TRINITY_DN7111  | Forward primer | GAGAGCTGGTACTATCTCAAGGATG |
|                 | Reverse primer | GTCACCTCCAATCATGAAGAATCC  |
| TRINITY_DN3137  | Forward primer | GAGGTAGGGAAATTAGTTATGGGAG |
|                 | Reverse primer | AGTAAAGATTGTGGGCTCAATGTAG |

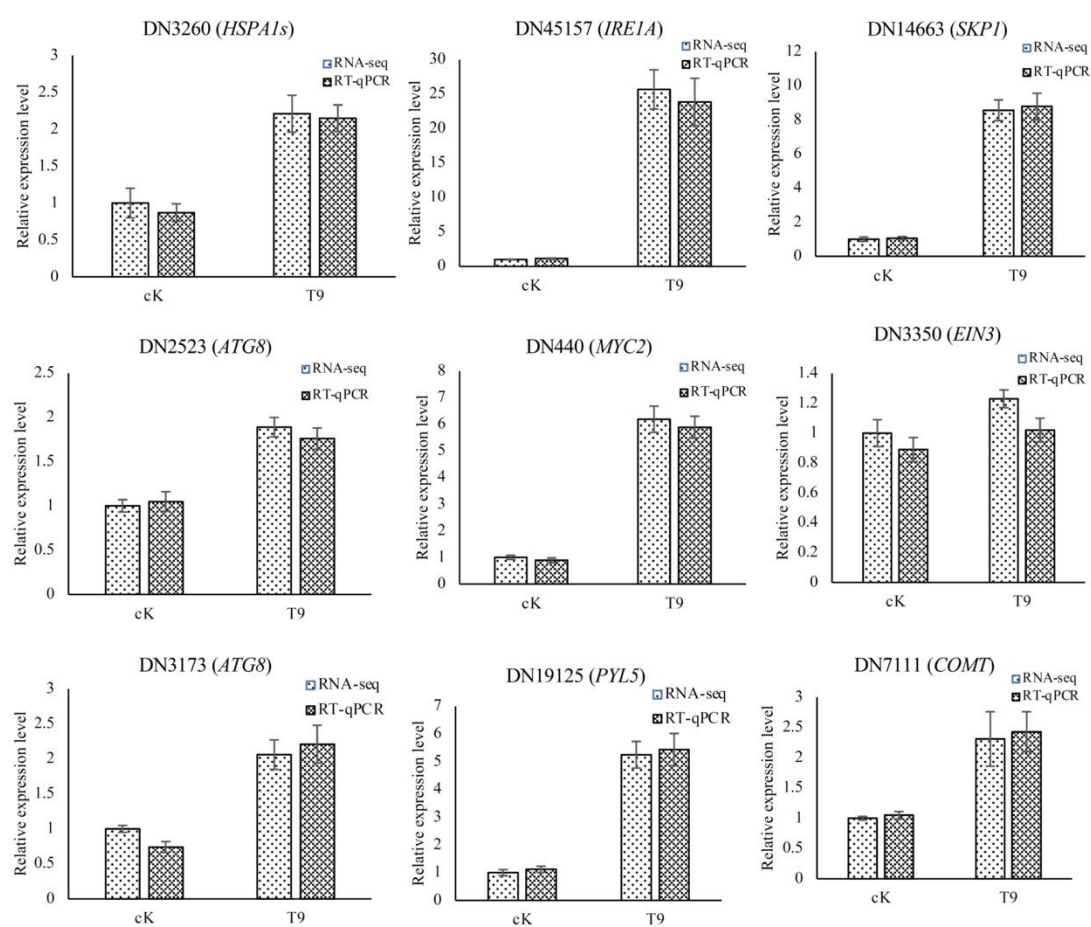

Figure S1. qRT-PCR analysis of differential gene expression levels
